# Supplementary material for: Two-dimensional BiTeI as a novel perovskite additive for printable perovskite solar cells
Source: Royal Society of Chemistry journal article supplement (doi:10.1039/d2se01109c), 2022-01-01
Supplement: d2se01109c1.pdf [file d2se01109c1.pdf]

## Supplementary Information

### Two-Dimensional BiTeI as a Novel Perovskite Additive for Printable Perovskite Solar Cells

**Dimitris Tsikritzis<sup>1,2</sup>, Konstantinos Chatzimanolis<sup>1</sup>, Nikolaos Tzoganakis<sup>1</sup>, Sebastiano Bellani<sup>3</sup>, Marilena Isabella Zappia<sup>3</sup>, Gabriele Bianca<sup>4</sup>, Nicola Curreli<sup>5</sup>, Joka Buha<sup>3,6</sup>, Ilka Kriegel<sup>5</sup>, Nikolas Antonatos<sup>7</sup>, Zdeněk Sofer<sup>7</sup>, Miron Krassas<sup>1</sup>, Konstantinos Rogdakis<sup>1,2</sup> Francesco Bonaccorso<sup>3,4</sup> and Emmanuel Kymakis<sup>1,2</sup>**

<sup>1</sup>Department of Electrical & Computer Engineering, Hellenic Mediterranean University (HMU), Heraklion 71410, Crete, Greece.

<sup>2</sup> Institute of Emerging Technologies (i-EMERGE) of HMU Research Center, Heraklion 71410, Crete, Greece

<sup>3</sup> BeDimensional S.p.A., Via Lungotorrente secca 30R, 16163 Genova, Italy

<sup>4</sup> Graphene Labs, Istituto Italiano di Tecnologia, via Morego, 30, 16163, Genova, Italy

<sup>5</sup> Functional Nanosystems, Istituto Italiano di Tecnologia, via Morego, 30, 16163, Genova, Italy

<sup>6</sup> Department of Nanochemistry, Istituto Italiano di Tecnologia, via Morego, 30, 16163, Genova, Italy

<sup>7</sup> Department of Inorganic Chemistry, University of Chemistry and Technology Prague, Technická 5, Prague 6, 16628 Czech Republic

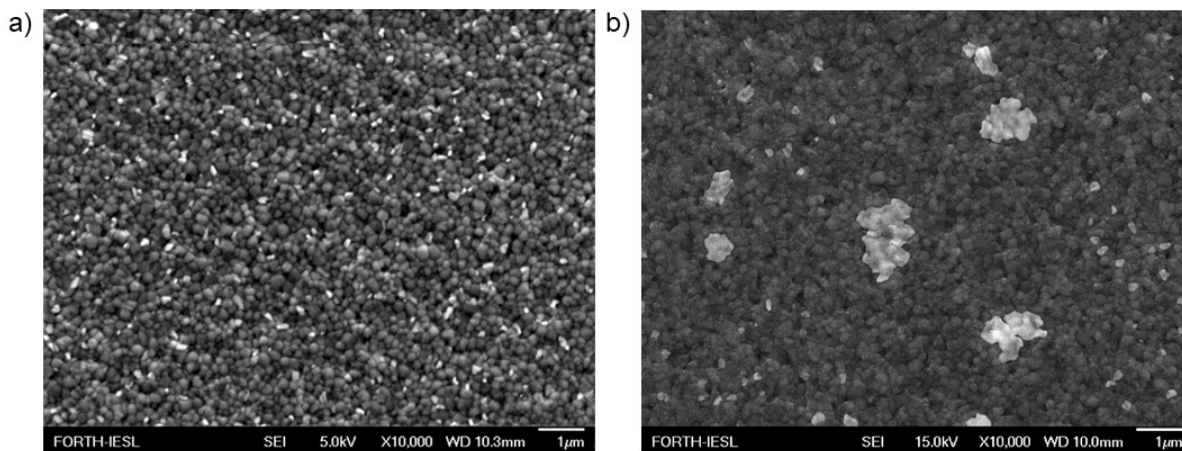

Figure S1. Top-view SEM images of the a) pristine perovskite and b) BiTeI-incorporating perovskite produced with a BiTeI flakes concentration in the perovskite precursor solution of  $0.05 \text{ mg mL}^{-1}$ .

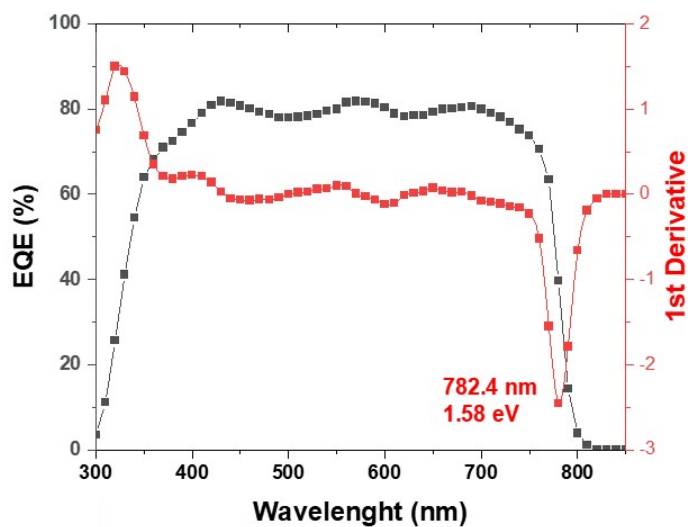

Figure S2. EQE spectrum and its first derivative measured for the PSC based on the BiTeI-incorporating perovskite produced with a BiTeI flakes concentration in the perovskite precursor solution of the  $0.05 \text{ mg mL}^{-1}$ . The minimum of the first derivative corresponds to the photovoltaic device bandgap of the perovskite.

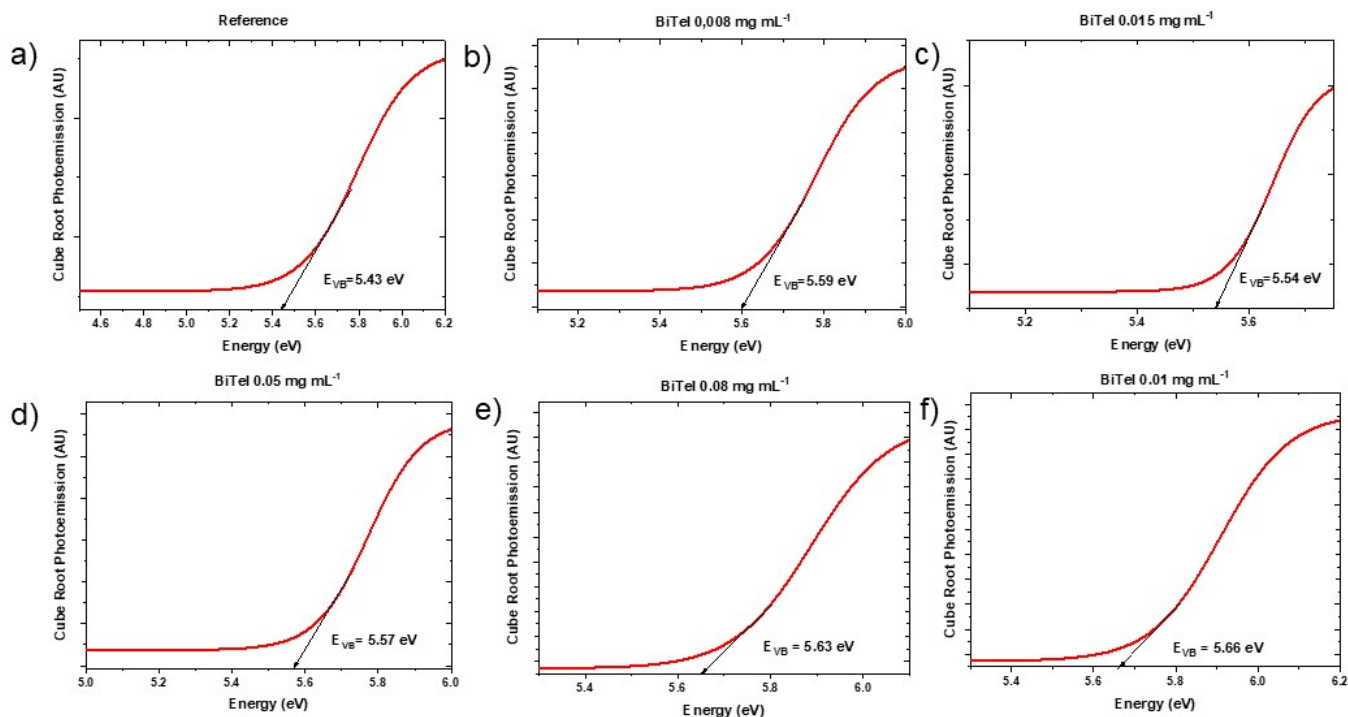

**Figure S3.** Ambient photoemission spectroscopy spectra measured for a) the pristine perovskite, and the BiTeI-incorporating perovskite produced with a BiTeI flakes concentration in the perovskite precursor solution of b)  $0.008 \text{ mg mL}^{-1}$ , c)  $0.015 \text{ mg mL}^{-1}$ , d)  $0.05 \text{ mg mL}^{-1}$ , e)  $0.08 \text{ mg mL}^{-1}$ , and f)  $0.1 \text{ mg mL}^{-1}$ . The spectra have been used to estimate the VB maximum energy levels of the investigated perovskites.

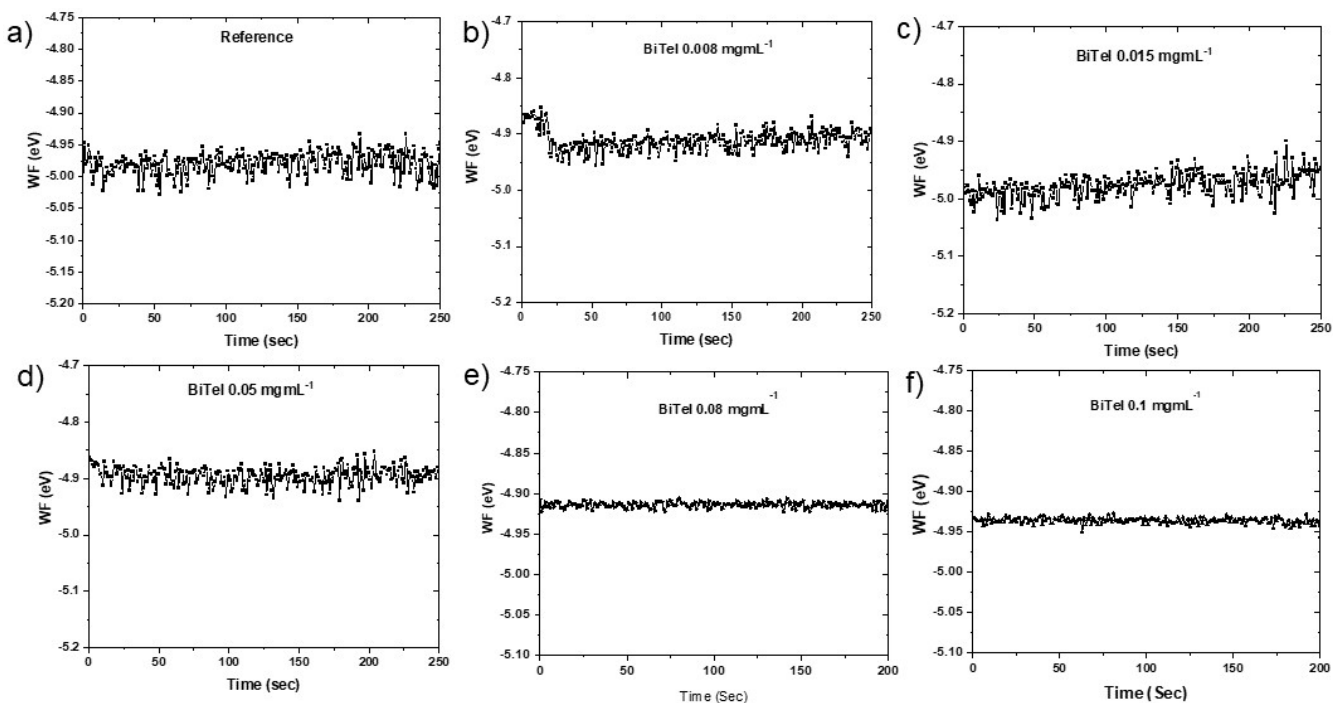

**Figure S4.** WF measurements for a) measured for a) the pristine perovskite, and the BiTeI-incorporating perovskites produced with a BiTeI flakes concentration in the perovskite precursor solution of b)  $0.008 \text{ mg mL}^{-1}$ , c)  $0.015 \text{ mg mL}^{-1}$ , d)  $0.05 \text{ mg mL}^{-1}$ , e)  $0.08 \text{ mg mL}^{-1}$ , and f)  $0.1 \text{ mg mL}^{-1}$ .

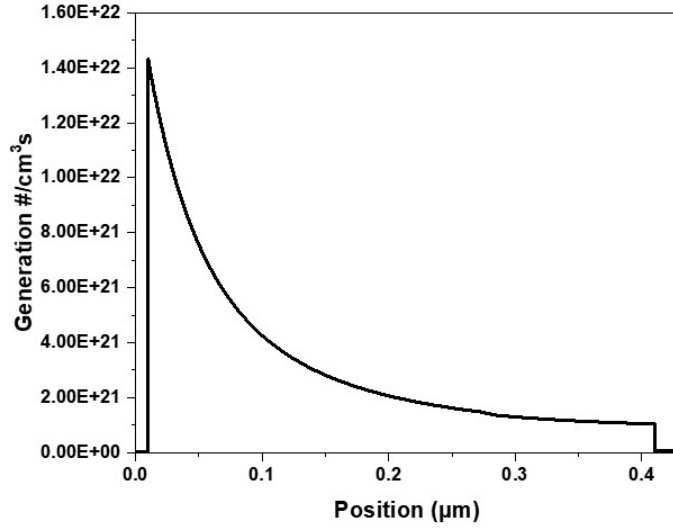

**Figure S5.** Simulation of the charge carrier generation rate across the device. The charge carrier generation rate in the perovskite increases near the perovskite/PTAA interface, while it is suppressed near the perovskite/PCBM interface. The generation rate is the same for the pristine and BiTeI incorporating devices.

**Table S1.** Materials properties of PTAA, perovskite, and PCBM used in the device simulations.

| Parameter                                                     | PTAA                                                                             | Perovskite           | PCBM                                                                             |
|---------------------------------------------------------------|----------------------------------------------------------------------------------|----------------------|----------------------------------------------------------------------------------|
| Bandgap (eV)                                                  | 3.0                                                                              | 1.58                 | 2                                                                                |
| Electron Affinity                                             | 2.4                                                                              | 3.85-4.1             | 3.9                                                                              |
| Dielectric permittivity                                       | 3.5                                                                              | 70                   | 3                                                                                |
| Thickness (nm)                                                | 10                                                                               | 400                  | 30                                                                               |
| CB/VB effective density of states ( $\text{cm}^{-3}$ )        | $1 \times 10^{20}$                                                               | $1.5 \times 10^{18}$ | $1 \times 10^{20}$                                                               |
| Thermal velocity $e^-/h^+$                                    | $1 \times 10^7$                                                                  | $1 \times 10^7$      | $1 \times 10^7$                                                                  |
| Electron mobility ( $\text{cm}^2\text{V}^{-1}\text{s}^{-1}$ ) | $1.5 \times 10^{-4}$                                                             | 10                   | $5 \times 10^{-2}$                                                               |
| Hole mobility ( $\text{cm}^2\text{V}^{-1}\text{s}^{-1}$ )     | $1.5 \times 10^{-4}$                                                             | 10                   | $5 \times 10^{-2}$                                                               |
| Shallow donor density ( $\text{cm}^{-3}$ )                    | 0                                                                                | $1 \times 10^{13}$   | $1 \times 10^{15}$                                                               |
| Shallow acceptor density ( $\text{cm}^{-3}$ )                 | $1 \times 10^{15}$                                                               | $1 \times 10^{13}$   | 0                                                                                |
| Radiative recombination coefficient                           | 0                                                                                | $3 \times 10^{-11}$  | 0                                                                                |
| Absorption                                                    | $\text{sqrt}(h\nu - E_g)$ law, $a_0 = 1 \times 10^4$ , $b^0 = 1 \times 10^{-12}$ | From [1]             | $\text{sqrt}(h\nu - E_g)$ law, $a_0 = 1 \times 10^5$ , $b^0 = 1 \times 10^{-12}$ |

**Table S2.** Properties related to defects in PTAA, perovskite, PCBM, and interfaces used in device simulations.

|                                                                | PTAA                | Perovskite          | PCBM                | Perovskite/PTAA     | Perovskite/PCBM     |
|----------------------------------------------------------------|---------------------|---------------------|---------------------|---------------------|---------------------|
| Defect type                                                    | Neutral             | Neutral             | Neutral             | Neutral             | Neutral             |
| capture cross section electrons and holes ( $\text{cm}^{-2}$ ) | $5 \times 10^{-14}$ | $1 \times 10^{-14}$ | $5 \times 10^{-14}$ | $1 \times 10^{-19}$ | $1 \times 10^{-19}$ |
| Energetic Distribution                                         | Gauss               | Gauss               | Gauss               | Gauss               | Gauss               |
| characteristic                                                 | 0.1                 | 0.1                 | 0.1                 | 0.1                 | 0.1                 |

|                                                       |                      |                    |                      |                    |                    |
|-------------------------------------------------------|----------------------|--------------------|----------------------|--------------------|--------------------|
| energy (eV)                                           |                      |                    |                      |                    |                    |
| Defect Energy Position (eV)                           | 0 above $E_i$        | 0 above $E_i$      | 0 above $E_i$        | 0 above $E_i$      | 0 above $E_i$      |
| Defect density ( $\text{cm}^{-3}$ )                   | $2 \times 10^{15}$   | $3 \times 10^{14}$ | $2 \times 10^{15}$   | $2 \times 10^{14}$ | $1 \times 10^{15}$ |
| Lifetime (ns)                                         | 1                    | 33                 | 1                    |                    |                    |
| Diffusion Length ( $\mu\text{m}$ )                    | $6.2 \times 10^{-4}$ | 0.93               | $1.1 \times 10^{-2}$ |                    |                    |
| Surface recombination velocity ( $\text{cm s}^{-1}$ ) | 0                    | 0                  | 0                    | 200                | 1000               |

**Table S3. Properties of contacts used in device simulation.**

| Parameter                                                  | ITO             | Ag              | Device |
|------------------------------------------------------------|-----------------|-----------------|--------|
| Thermionic emission $e^-/h^+$ ( $\text{cm s}^{-1}$ )       | $1 \times 10^7$ | $1 \times 10^7$ |        |
| Majority carrier barrier height relative to the $E_F$ (eV) | 0.1             | 0.1             |        |
| Light Transmission                                         | 0.85            |                 |        |
| Light Reflection                                           |                 | 0.50            |        |
| Series Resistance ( $\Omega\text{cm}^2$ )                  |                 |                 | 1*     |

\* The simulation of devices based on BiTeI-incorporating perovskite resulted in FF values over 84%. To suppress FF close to the experimental values, we considered the addition of a series resistance of  $1 \Omega \text{ cm}^2$  for simulating the devices based on the BiTeI-incorporating perovskites.

The input parameters for the simulations were acquired from experimental results and the literature [2]–[7].

## References

- [1] A. Tejada *et al.*, “Hybrid Perovskite Degradation from an Optical Perspective: A Spectroscopic Ellipsometry Study from the Deep Ultraviolet to the Middle Infrared,” *Adv. Opt. Mater.*, vol. 10, no. 3, p. 2101553, Feb. 2022, doi: 10.1002/adom.202101553.
- [2] M. Stolterfoht, V. M. Le Corre, M. Feuerstein, P. Caprioglio, L. J. A. Koster, and D. Neher, “Voltage-Dependent Photoluminescence and How It Correlates with the Fill Factor and Open-Circuit Voltage in Perovskite Solar Cells,” *ACS Energy Lett.*, vol. 4, no. 12, pp. 2887–2892, Dec. 2019, doi: 10.1021/acsenenergylett.9b02262.
- [3] J. Diekmann *et al.*, “Pathways toward 30% Efficient Single-Junction Perovskite Solar Cells and the Role of Mobile Ions,” *Sol. RRL*, vol. 5, no. 8, p. 2100219, Aug. 2021, doi: 10.1002/solr.202100219.
- [4] T. Minemoto, Y. Kawano, T. Nishimura, and J. Chantana, “Numerical reproduction of a perovskite solar cell by device simulation considering band gap grading,” *Opt. Mater. (Amst.)*, vol. 92, no. December 2018, pp. 60–66, Jun. 2019, doi: 10.1016/j.optmat.2019.03.048.
- [5] T. Minemoto and M. Murata, “Theoretical analysis on effect of band offsets in perovskite solar cells,” *Sol. Energy Mater. Sol. Cells*, vol. 133, pp. 8–14, Feb. 2015, doi: 10.1016/j.solmat.2014.10.036.
- [6] R. Brenes *et al.*, “Metal Halide Perovskite Polycrystalline Films Exhibiting Properties of Single Crystals,” *Joule*, vol. 1, no. 1, pp. 155–167, 2017, doi: 10.1016/j.joule.2017.08.006.
- [7] P. Zhao *et al.*, “Device simulation of inverted  $\text{CH}_3\text{NH}_3\text{PbI}_{3-x}\text{Cl}_x$  perovskite solar cells based on PCBM electron transport layer and NiO hole transport layer,” *Sol. Energy*, vol. 169, no. April, pp. 11–18, Jul. 2018, doi: 10.1016/j.solener.2018.04.027.
